# Supplementary material for: Design of vilazodone-donepezil chimeric derivatives as acetylcholinesterase inhibitors by QSAR, molecular docking and molecular dynamics simulations
Source: Royal Society of Chemistry journal article supplement (doi:10.1039/d4cp01741b), 2024-01-01
Supplement: d4cp01741b1.pdf [file d4cp01741b1.pdf]

## SUPPORTING INFORMATION

### **Design of vilazodone-donepezil chimeric derivatives as Acetylcholinesterase inhibitors by QSAR, molecular docking and molecular dynamics simulations**

Liyuan Guo<sup>1,2</sup>, Zelei Chang<sup>1,2</sup>, Jianbo Tong\*<sup>1,2</sup>, Peng Gao<sup>1,2</sup>, Yakun Zhang<sup>1,2</sup>, Yuan  
Liu<sup>1,2</sup>, Yulu Yang<sup>1,2</sup>, Chunying Wang

*<sup>1</sup>College of Chemistry and Chemical Engineering, Shaanxi University of Science and  
Technology, Xi'an 710021, China*

*<sup>2</sup>Shaanxi Key Laboratory of Chemical Additives for Industry, Xi'an 710021, China*

*\*Corresponding author: Jian-Bo Tong\*<sup>1,2</sup>;*

*E-mail: [jianbotong@aliyun.com](mailto:jianbotong@aliyun.com)*

**Table S1.** Compound structure and activity values

| Comp. | Structure                                                                            | IC <sub>50</sub> (nM) | pIC <sub>50</sub> |
|-------|--------------------------------------------------------------------------------------|-----------------------|-------------------|
| 1     | 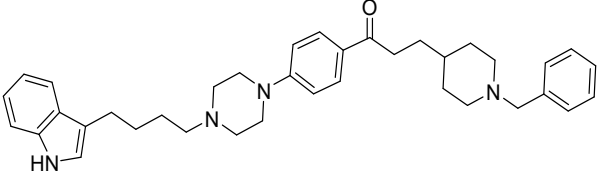   | 1.51                  | 8.82              |
| 2     |    | 2.43                  | 8.61              |
| 3*    |    | 3.52                  | 8.45              |
| 4     |   | 7.75                  | 8.11              |
| 5*    |  | 2.42                  | 8.62              |
| 6     |  | 2.28                  | 8.64              |
| 7     |  | 3.28                  | 8.48              |
| 8     |  | 3.71                  | 8.43              |

|     |  |       |      |
|-----|--|-------|------|
| 9*  |  | 11.18 | 7.95 |
| 10* |  | 392.8 | 6.41 |
| 11  |  | 123.5 | 6.91 |
| 12  |  | 366.1 | 6.44 |
| 13* |  | 249.2 | 6.60 |
| 14* |  | 40.4  | 7.39 |
| 15  |  | 76.5  | 7.12 |
| 16  |  | 8.95  | 8.05 |

|    |                                                                                      |      |      |
|----|--------------------------------------------------------------------------------------|------|------|
| 17 | 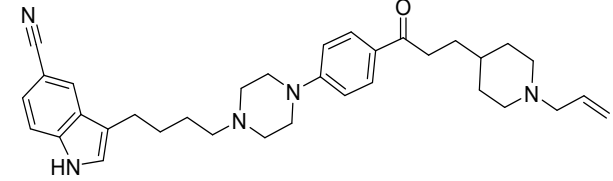   | 267  | 6.57 |
| 18 |    | 1138 | 5.94 |
| 19 |    | 12.0 | 7.92 |
| 20 |    | 10.9 | 7.96 |
| 21 |  | 32.4 | 7.49 |
| 22 |  | 27.0 | 7.57 |
| 23 |  | 91.5 | 7.04 |
| 24 |  | 18.3 | 7.74 |

|     |                                                                                      |      |      |
|-----|--------------------------------------------------------------------------------------|------|------|
| 25  | 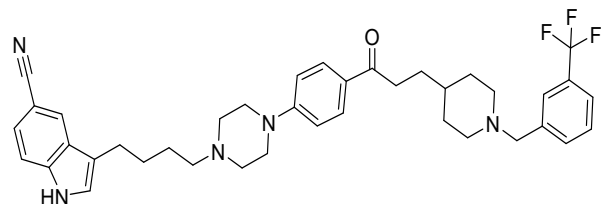   | 294  | 6.53 |
| 26  |    | 644  | 6.19 |
| 27* |    | 7.98 | 8.10 |
| 28  |   | 3.01 | 8.52 |
| 29  |  | 3.94 | 8.40 |

\* selected as test set

**Table S2.** Actual and predicted activity of compounds in training and test sets

| NO. | Actual pIC <sub>50</sub> | Topomer CoMFA model         |          |                       |       |
|-----|--------------------------|-----------------------------|----------|-----------------------|-------|
|     |                          | Predicted pIC <sub>50</sub> | Residual | Fragment contribution |       |
|     |                          |                             |          | R1                    | R2    |
| 1   | 8.82                     | 8.89                        | -0.07    | 0.05                  | 1.70  |
| 2   | 8.61                     | 8.59                        | 0.02     | -0.25                 | 1.70  |
| 3*  | 8.45                     | 8.46                        | -0.01    | -0.38                 | 1.70  |
| 4   | 8.11                     | 8.19                        | -0.08    | -0.65                 | 1.70  |
| 5*  | 8.62                     | 8.74                        | -0.12    | -0.11                 | 1.70  |
| 6   | 8.64                     | 8.54                        | 0.10     | -0.30                 | 1.70  |
| 7   | 8.48                     | 8.56                        | -0.08    | -0.28                 | 1.70  |
| 8   | 8.43                     | 8.41                        | 0.02     | -0.43                 | 1.70  |
| 9*  | 7.95                     | 8.28                        | -0.33    | -0.56                 | 1.70  |
| 10* | 6.41                     | 6.45                        | -0.04    | -0.86                 | 1.70  |
| 11  | 6.91                     | 7.00                        | -0.09    | -0.86                 | 0.72  |
| 12  | 6.44                     | 6.44                        | 0.00     | -0.86                 | 0.16  |
| 13* | 6.60                     | 6.99                        | -0.39    | -0.86                 | 0.71  |
| 14* | 7.39                     | 6.90                        | 0.49     | -0.86                 | 0.62  |
| 15  | 7.12                     | 7.17                        | -0.05    | -0.86                 | 0.89  |
| 16  | 8.05                     | 8.16                        | -0.11    | -0.86                 | 1.89  |
| 17  | 6.57                     | 6.55                        | 0.02     | -0.86                 | 0.27  |
| 18  | 5.94                     | 5.87                        | 0.07     | -0.86                 | -0.41 |
| 19  | 7.92                     | 7.80                        | 0.12     | -0.86                 | 1.53  |
| 20  | 7.96                     | 7.86                        | 0.10     | -0.86                 | 1.58  |
| 21  | 7.49                     | 7.47                        | 0.02     | -0.86                 | 1.19  |
| 22  | 7.57                     | 7.48                        | 0.09     | -0.86                 | 1.20  |
| 23  | 7.04                     | 7.23                        | -0.19    | -0.86                 | 0.96  |
| 24  | 7.74                     | 7.63                        | 0.11     | -0.86                 | 1.36  |
| 25  | 6.53                     | 6.54                        | -0.01    | -0.86                 | 0.26  |
| 26  | 6.19                     | 6.22                        | -0.03    | -0.86                 | -0.05 |
| 27* | 8.10                     | 8.04                        | 0.06     | -0.86                 | 1.76  |
| 28  | 8.52                     | 8.46                        | 0.06     | -0.86                 | 2.18  |
| 29  | 8.40                     | 8.40                        | 0.00     | -0.86                 | 2.12  |

\* were selected as test set

**Table S3.** Structures and predicted pIC<sub>50</sub> values of newly designed molecules

| Comp. | Structure                                                                            | pIC <sub>50</sub> (Pred) | R1   | R2   |
|-------|--------------------------------------------------------------------------------------|--------------------------|------|------|
| N01   | 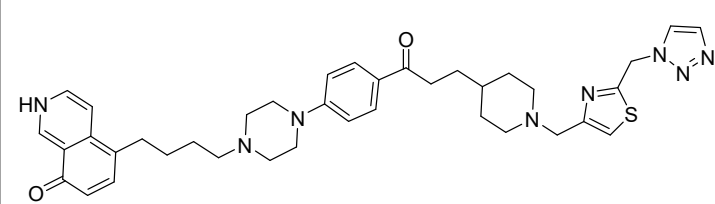   | 10.23                    | 0.76 | 2.33 |
| N02   |    | 10.79                    | 0.76 | 2.89 |
| N03   |   | 11.16                    | 0.76 | 3.27 |
| N04   |  | 10.75                    | 0.76 | 2.85 |
| N05   |  | 11.13                    | 0.76 | 3.24 |
| N06   |  | 10.67                    | 0.76 | 2.77 |

|     |  |       |      |      |
|-----|--|-------|------|------|
| N07 |  | 10.17 | 0.76 | 2.28 |
| N08 |  | 10.18 | 0.76 | 2,28 |
| N09 |  | 11.00 | 0.76 | 3.10 |
| N10 |  | 10.99 | 0.76 | 3.09 |
| N11 |  | 10.60 | 0.76 | 2.70 |
| N12 |  | 10.21 | 0.74 | 2.33 |
| N13 |  | 10.77 | 0.74 | 2.89 |



|     |  |       |      |      |
|-----|--|-------|------|------|
| N14 |  | 11.14 | 0.74 | 3.27 |
| N15 |  | 10.73 | 0.74 | 2.85 |
| N16 |  | 10.81 | 0.43 | 3.24 |
| N17 |  | 10.64 | 0.74 | 2.77 |
| N18 |  | 10.13 | 0.71 | 2.28 |
| N19 |  | 10.16 | 0.74 | 2.28 |
| N20 |  | 10.98 | 0.74 | 3.10 |

|     |  |       |      |      |
|-----|--|-------|------|------|
| N21 |  | 10.97 | 0.74 | 3.09 |
| N22 |  | 10.57 | 0.74 | 2.70 |
| N23 |  | 10.14 | 0.67 | 2.33 |
| N24 |  | 10.70 | 0.67 | 2.89 |
| N25 |  | 11.07 | 0.67 | 3.27 |
| N26 |  | 9.67  | 0.67 | 1.87 |
| N27 |  | 11.04 | 0.67 | 3.24 |

|     |  |       |      |      |
|-----|--|-------|------|------|
| N28 |  | 10.58 | 0.67 | 2.77 |
| N29 |  | 10.08 | 0.67 | 2.28 |
| N30 |  | 10.09 | 0.67 | 2.28 |
| N31 |  | 10.91 | 0.67 | 3.10 |
| N32 |  | 10.90 | 0.67 | 3.09 |
| N33 |  | 10.51 | 0.67 | 2.70 |

**Table S4.** Docking scores and amino acid interactions of newly designed compounds in Autodock Vina

| Comp. | Binding energy score (Kcal/mol) | Hydrogen bond interacting residues        | Hydrophobic interactions                                     |
|-------|---------------------------------|-------------------------------------------|--------------------------------------------------------------|
| N01   | -11.7                           | Ser293 、 Tyr124                           | Tyr337 、 Trp286                                              |
| N02   | -12.0                           | Ala343 、 Phe346 、 Val340 、 Tyr72 、 Tyr124 | His447 、 Trp286 、 Tyr337 、 Phe338                            |
| N03   | -11.4                           | Ser125 、 Ser293 、 Tyr124                  | Trp86 、 Trp286 、 Tyr337 、 Gly121 、 Phe338                    |
| N04   | -11.6                           | Ser125 、 Tyr124                           | Tyr337 、 Trp86 、 Trp286 、 Gly121 、 Phe338                    |
| N05   | -12.2                           | Ser203 、 Ser293 、 Phe295                  | Trp286 、 Tyr124 、 Tyr337 、 Tyr341 、 Phe297 、 Phe338          |
| N06   | -11.2                           | Ser125 、 Trp286                           | Trp86 、 Phe338 、 Tyr337 、 Leu289                             |
| N07   | -11.6                           | Tyr72 、 Tyr124                            | Leu289 、 Tyr337 、 Tyr341 、 Phe338 、 Trp286 、 His447 、 Val294 |
| N08   | -10.0                           | Tyr72 、 Tyr124 、 Tyr133                   | Phe338 、 His447 、 Tyr337 、 Trp286                            |
| N09   | -11.1                           | Tyr72 、 Tyr124 、 Ser125                   | Trp86 、 Trp286 、 Tyr337                                      |
| N10   | -11.3                           | Gln291 、 Ser293 、 Tyr72                   | Tyr337 、 Tyr341 、 Phe338 、 Tyr124 、 Trp86 、 Trp286 、 His447  |
| N11   | -12.5                           | Gln291 、 Ser293 、 Tyr341                  | Tyr124 、 Trp86 、 Trp286 、 Tyr337 、 Phe338                    |
| N12   | -11.3                           | Tyr72 、 Tyr124                            | Trp286 、 Phe338 、 Tyr337 、 His447                            |
| N13   | -10.6                           | Tyr133 、 Tyr341 、 Ser203 、 Glu202         | Trp286 、 Leu289 、 Phe338                                     |
| N14   | -10.9                           | Glu202 、 Tyr133                           | Trp86 、 Trp286 、 Tyr341 、 Phe338                             |
| N15   | -12.2                           | Ser125 、 Ser293                           | Trp86 、 Trp286 、 Leu289 、 Phe338 、 Tyr337 、 Tyr341           |
| N16   | -11.6                           | Ser125 、 Ser293                           | Trp86 、 Trp286 、 Leu289 、 Phe338 、 His287                    |
| N17   | -10.8                           | Tyr124                                    | Phe338 、 Tyr337 、 His447                                     |
| N18   | -10.7                           | Trp286 、 Tyr124                           | Leu76 、 Tyr337 、 Tyr341 、 Trp286 、 His447 、 Phe338           |
| N19   | -10.4                           | Tyr124                                    | Trp86 、 Trp286 、 Phe338 、 Tyr337                             |
| N20   | -10.8                           | Trp286 、 Tyr124 、 Ser293                  | Tyr337 、 Tyr341 、 Phe338 、 His447                            |
| N21   | -11.3                           | Tyr72 、 Tyr124 、 Ser125 、 Tyr341          | Trp86 、 Trp286 、 Tyr337 、 Gly121                             |
| N22   | -11.4                           | Gln291 、 Ser293 、 Tyr124                  | Trp286 、 Tyr337 、 Tyr341 、 Phe338 、 His447                   |

|     |       |                                    |                                                 |
|-----|-------|------------------------------------|-------------------------------------------------|
| N23 | -11.3 | Tyr124                             | Gly120、Tyr72、Tyr337、Trp286、Phe338、Tyr341、Val294 |
| N24 | -12.5 | Ans87、Ser293                       | Leu289、Trp86、Trp286、Tyr337、Tyr341、Phe338        |
| N25 | -11.7 | Ans87、Ser293、Leu289                | Trp86、Trp286、Phe338、Tyr337、Tyr341、His447        |
| N26 | -11.4 | Phe296、Trp286                      | Tyr337、Trp86、Phe338                             |
| N27 | -12.3 | Trp86、Tyr124、Tyr72、Phe295          | Trp286、Tyr337、Phe338                            |
| N28 | -12.7 | Tyr124、Ser125、Ser293               | Leu289、Tyr337、Trp86、Phe338、Trp286               |
| N29 | -11.2 | Asp74、Trp86                        | Tyr124、Tyr337、Tyr341、Phe338、Trp286、His447       |
| N30 | -9.6  | Tyr133、Gly120、Ser293、Arg296、His447 | Trp86、Trp286、Tyr72、Tyr341、Phe338                |
| N31 | -12.0 | Tyr133、Ser125、Ser293               | Trp86、Trp286、Tyr337                             |
| N32 | -11.5 | Tyr124、Ser125、Ser293、Trp286        | Trp86、Phe338                                    |
| N33 | -12.6 | Tyr124、Gly120、Gln291、Ser293        | Trp86、Trp286、Tyr337、Phe338、Leu289               |

**Table S5.** Prediction of ADMET properties of newly designed compounds

| Comp. | Absorption |       |               | Distribution | Metabolism       |                  | Excretion                  | Toxicity      |
|-------|------------|-------|---------------|--------------|------------------|------------------|----------------------------|---------------|
|       | HIA(%)     | OB(%) | Caco2(nm/sec) | PPB(%)       | CYP2D6 substrate | CYP3A4 substrate | Total Clearance(ml/min/kg) | AMES toxicity |
| N01   | 99.29      | 61.43 | 83.60         | 70.29        | -                | +                | 6.012                      | -             |
| N02   | 97.18      | 54.29 | 84.25         | 70.56        | -                | +                | 5.527                      | -             |
| N03   | 99.00      | 55.71 | 83.52         | 79.13        | -                | +                | 6.172                      | -             |
| N04   | 93.16      | 52.86 | 83.06         | 88.23        | -                | +                | 4.177                      | -             |
| N05   | 98.11      | 55.71 | 82.99         | 77.01        | -                | +                | 5.699                      | -             |
| N06   | 98.66      | 50.00 | 82.31         | 90.94        | -                | +                | 5.110                      | -             |
| N07   | 97.25      | 60.00 | 83.50         | 85.29        | -                | +                | 7.480                      | -             |
| N08   | 99.71      | 52.86 | 83.00         | 90.60        | -                | +                | 4.674                      | -             |
| N09   | 96.96      | 68.57 | 85.05         | 57.13        | -                | +                | 5.347                      | -             |
| N10   | 92.78      | 52.86 | 84.18         | 62.61        | -                | +                | 4.794                      | -             |
| N11   | 98.41      | 57.14 | 83.24         | 95.93        | -                | +                | 3.686                      | -             |
| N12   | 96.80      | 60.00 | 83.31         | 66.06        | -                | +                | 4.285                      | -             |
| N13   | 96.94      | 57.14 | 83.86         | 64.88        | -                | +                | 3.081                      | -             |
| N14   | 97.98      | 57.14 | 83.17         | 69.34        | -                | +                | 5.261                      | -             |
| N15   | 95.37      | 54.29 | 82.64         | 81.40        | -                | +                | 2.665                      | -             |
| N16   | 92.28      | 51.43 | 81.85         | 81.16        | -                | +                | 4.816                      | -             |
| N17   | 98.19      | 55.71 | 81.97         | 81.20        | -                | +                | 4.283                      | -             |
| N18   | 91.80      | 60.00 | 83.53         | 77.01        | -                | +                | 6.646                      | -             |
| N19   | 98.89      | 50.00 | 82.76         | 84.62        | -                | +                | 3.035                      | -             |
| N20   | 97.94      | 65.71 | 83.45         | 60.77        | -                | +                | 4.089                      | -             |
| N21   | 95.53      | 50.00 | 83.12         | 62.68        | -                | +                | 3.776                      | -             |
| N22   | 97.29      | 54.29 | 83.26         | 91.43        | -                | +                | 3.019                      | -             |

|     |       |       |       |       |   |   |       |   |
|-----|-------|-------|-------|-------|---|---|-------|---|
| N23 | 97.99 | 58.57 | 84.73 | 91.86 | - | + | 6.017 | - |
| N24 | 98.67 | 65.71 | 84.65 | 60.95 | - | + | 5.587 | - |
| N25 | 98.60 | 58.57 | 84.43 | 57.99 | - | + | 5.778 | - |
| N26 | 98.47 | 57.14 | 83.82 | 66.61 | - | + | 6.316 | - |
| N27 | 97.80 | 54.29 | 82.83 | 79.56 | - | + | 3.923 | - |
| N28 | 97.65 | 57.14 | 80.86 | 70.57 | - | + | 5.405 | - |
| N29 | 96.46 | 62.86 | 84.14 | 78.46 | - | + | 7.087 | - |
| N30 | 98.99 | 52.86 | 83.70 | 81.03 | - | + | 4.686 | - |
| N31 | 98.58 | 72.86 | 85.02 | 55.67 | - | + | 4.935 | - |
| N32 | 98.06 | 54.29 | 84.58 | 58.89 | - | + | 5.072 | - |
| N33 | 98.66 | 52.86 | 84.00 | 83.87 | - | + | 4.132 | - |

Classification: (HIA%) 0–20% (poorly absorbed), 20–70% (moderately absorbed), 70–100% (well absorbed); (HOB%) > 50 (moderately utilised); caco2 cell permeability: < 4 (low permeability), 4–70 (moderate permeability), and >70 (higher permeability); plasma protein binding. > 0.9 (strongly bound), and <0.9 (weakly bound). (Total clearance). > 15 mL min<sup>-1</sup> kg<sup>-1</sup>: high, 5 mL min<sup>-1</sup> kg<sup>-1</sup> < Cl < 15 mL min<sup>-1</sup> kg<sup>-1</sup>: moderate, < 5 min<sup>-1</sup> kg<sup>-1</sup>: low.
